# Supplementary figures and images for: MicroRNA–Gene Interactions Impacted by Toxic Metal(oid)s during EMT and Carcinogenesis
Source: MDPI journal article supplement (doi:10.3390/cancers14235818), 2022-11-25

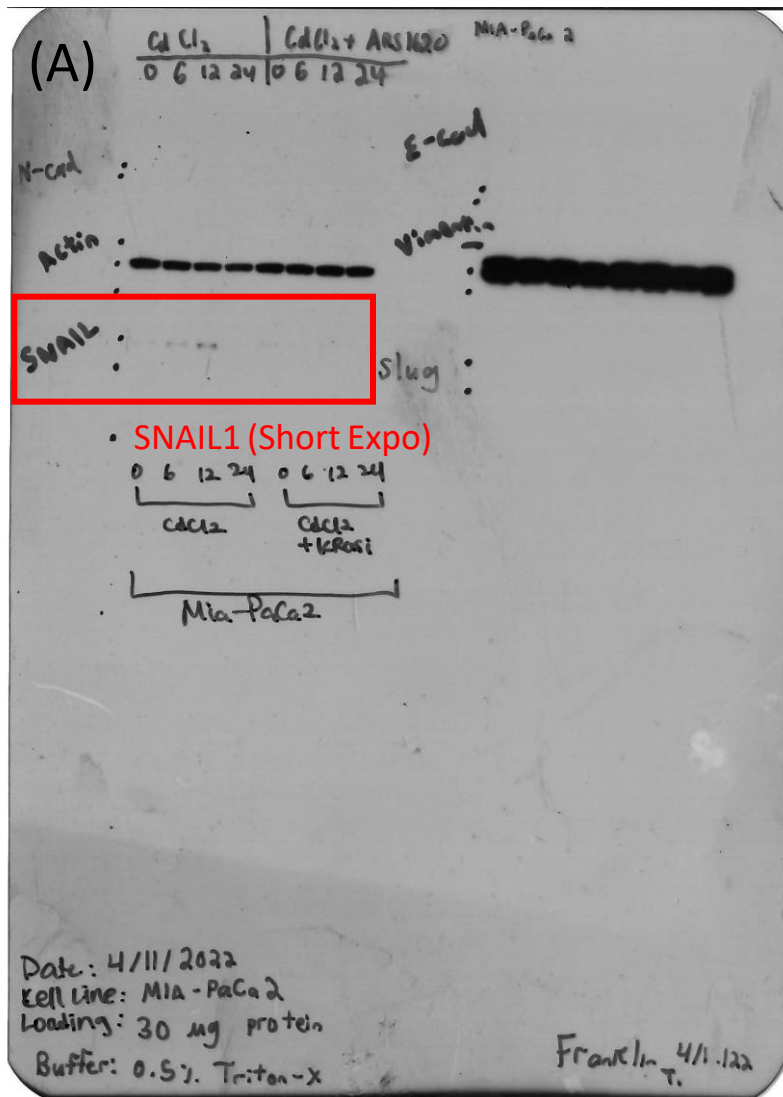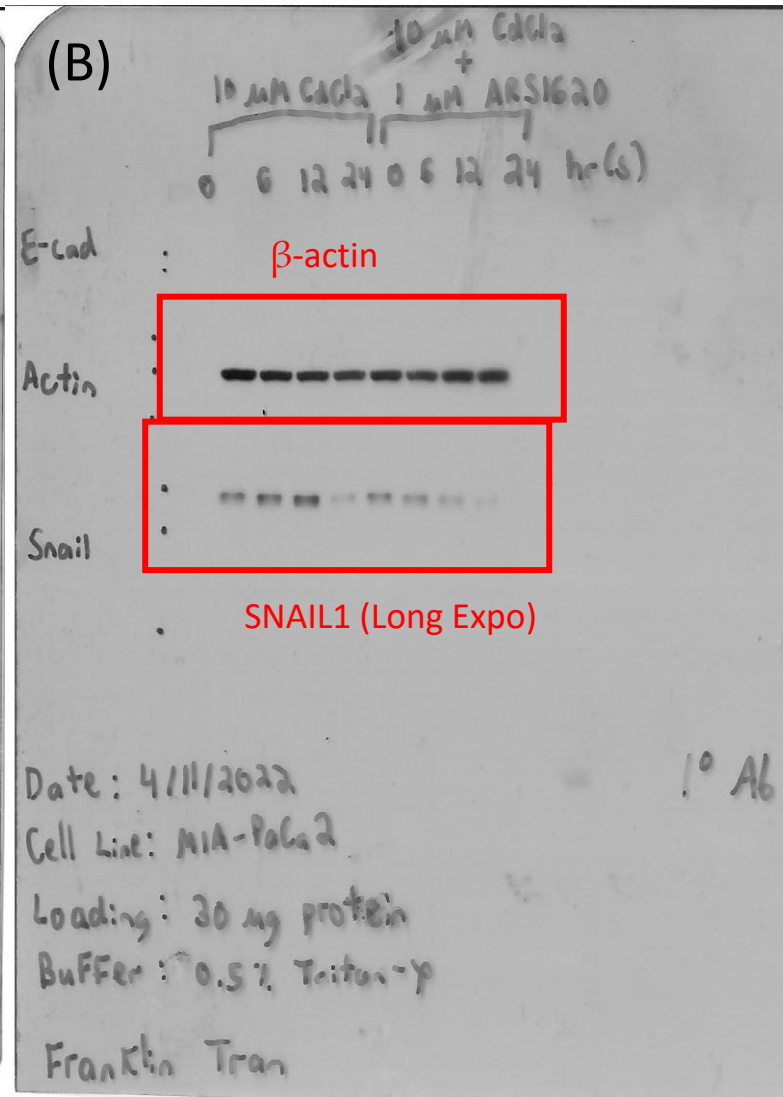

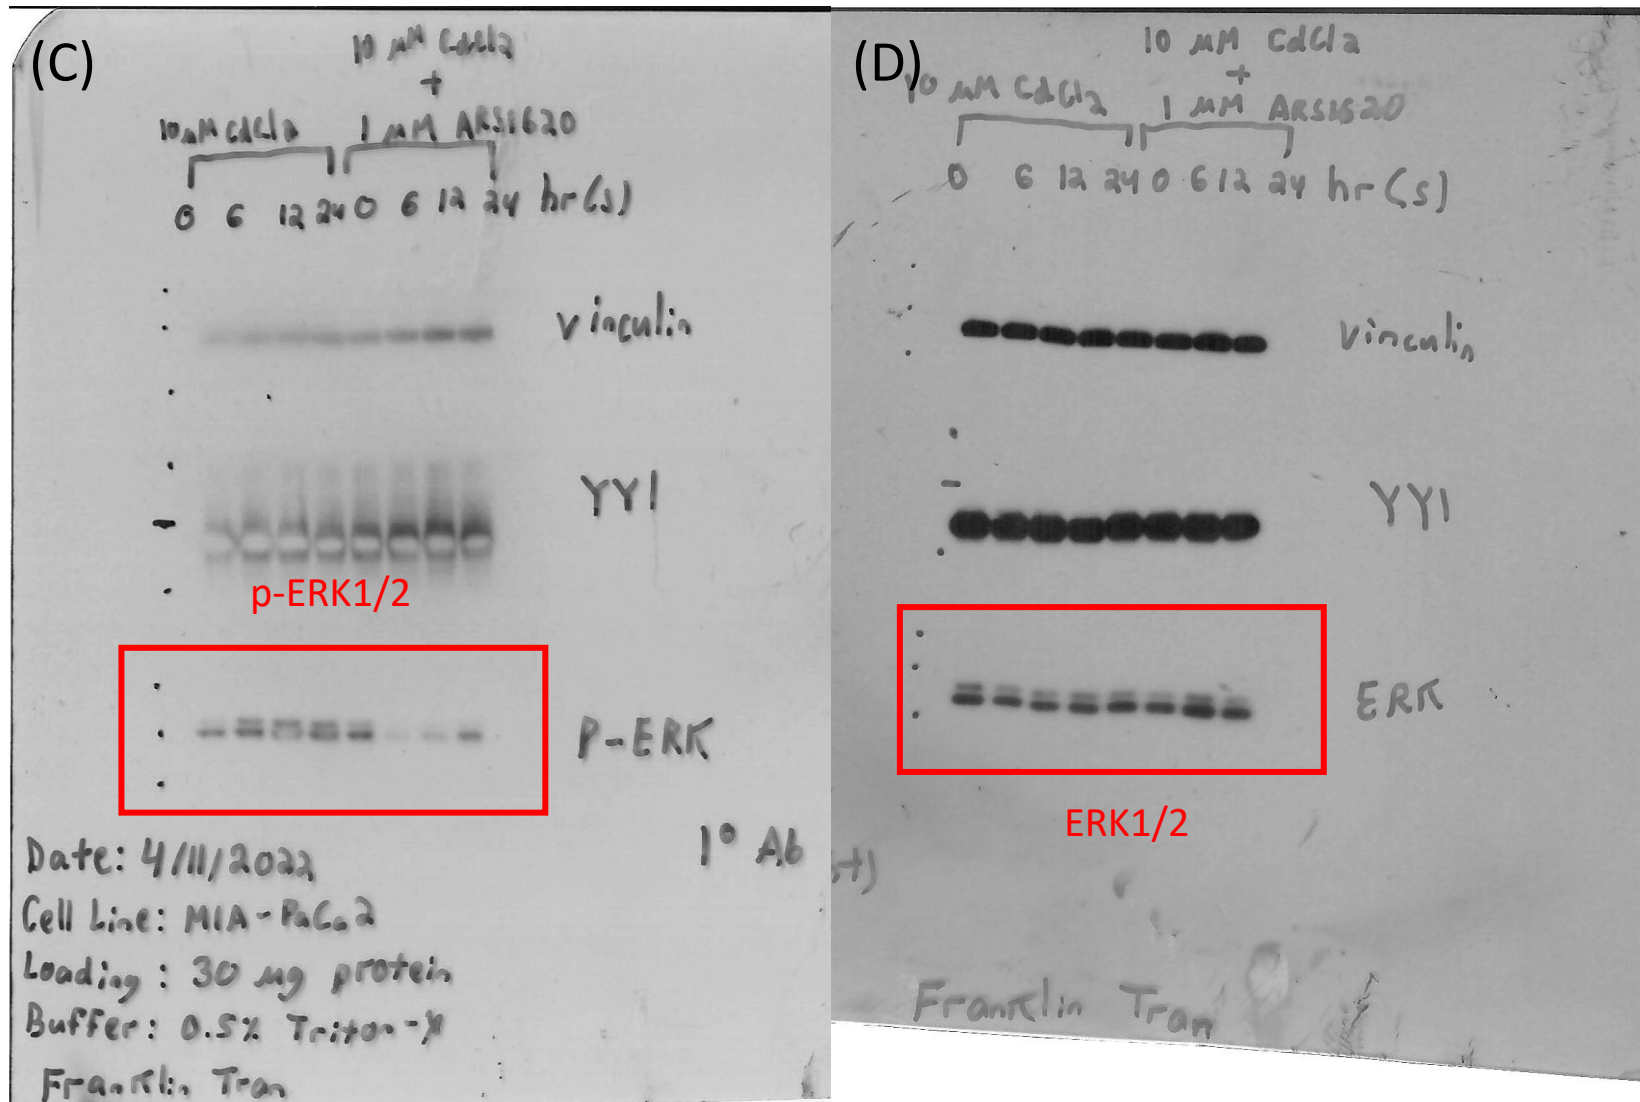

Figure S1. Western Blots for Figure 1. (A) SNAIL1 (Short Expo). (B)  $\beta$ -actin; SNAIL1 (Long Expo). (C) p-ERK1/2. (D) ERK1/2

Supplement: s1 [file s1]
